# Supplementary material for: Targeting 3-phosphoinositide-dependent protein kinase 1 associated with drug-resistant renal cell carcinoma using new oridonin analogs
Source: PubMed Central journal article supplement (PMC5386527; doi:10.1038/cddis.2017.121), 2017-03-23
Supplement: cddis2017121x1.pdf [file cddis2017121x1.pdf]

**Supplemental Figure 1. The effect of CYD-6-17 or Oridonin on the growth of drug resistant cells.** The effects of CYD-6-17 or Oridonin on growth of resistant cells (HK KD, 786-0 KD and Sor001) were determined by MTT assay. \*  $p < 0.05$ .

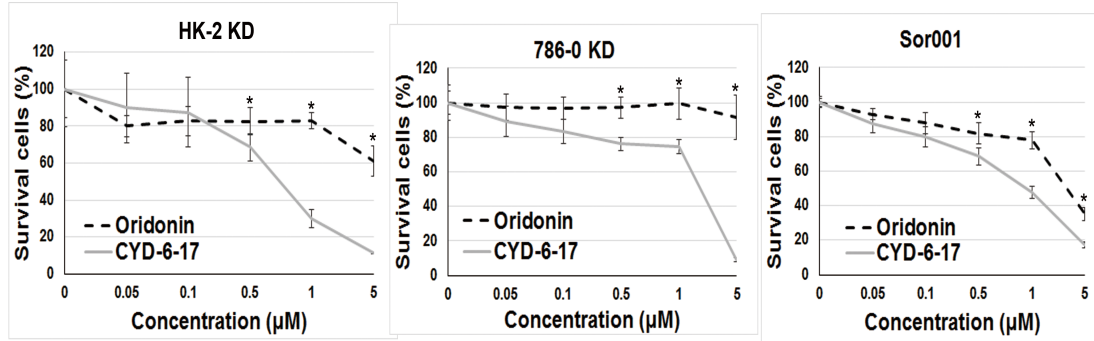

**Supplemental Figure 2. The comparison of the effect of CYD-6-17 on the growth of parental cells to drug resistant cells.** A. The effects of CYD-6-17 on growth of parental cells (HK Con, 786-0 Con) and other RCC cells were determined by MTT assay. Cell growth inhibition rate was calculated by normalization with the vehicle group (0 µM of CYD-6-17). B. Comparison of the potency of CYD-6-17 on the growth of parental cells (Con) and drug resistant cells (KD). \*  $p < 0.05$ .

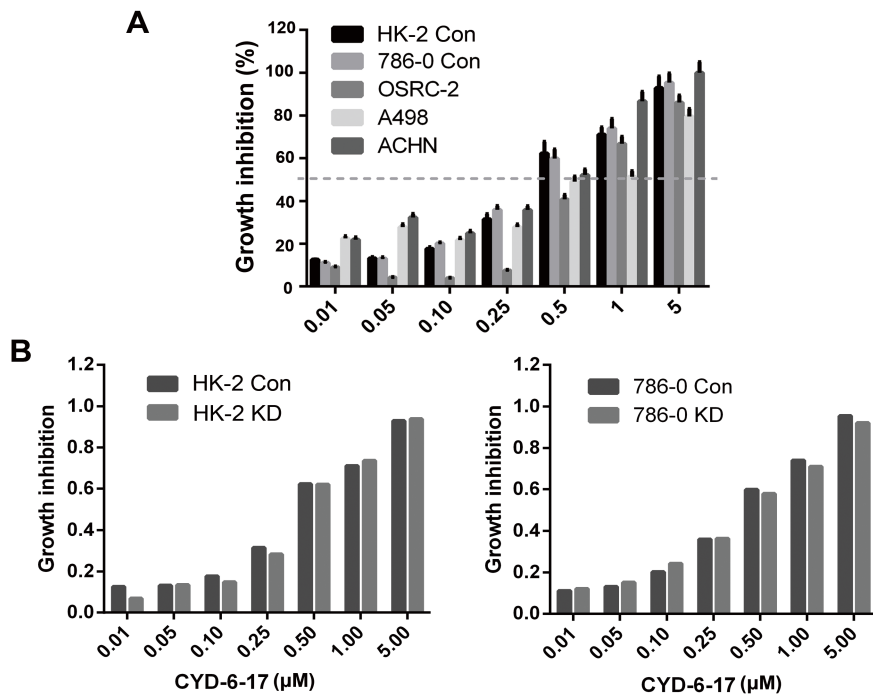

**Supplemental Figure 3.** Quantification of the expression of a panel of cell cycle regulatory factors in RCC cells treated with different concentrations of CYD-6-17.

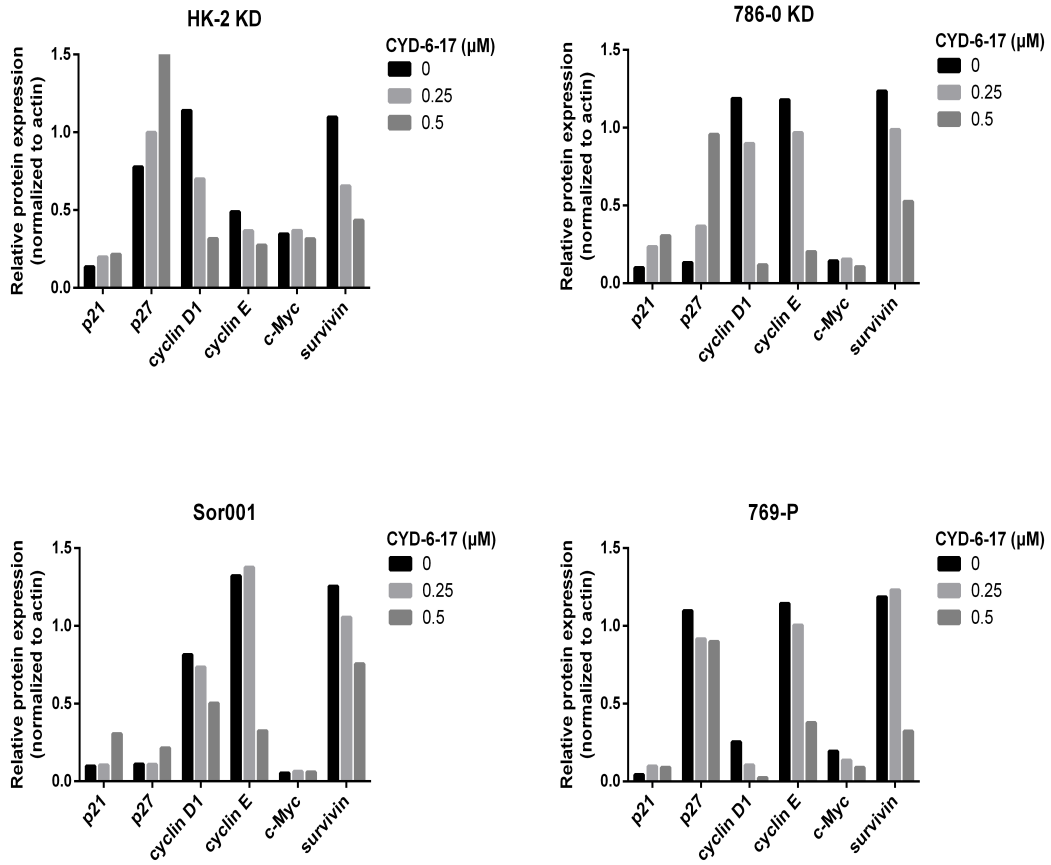

**Supplemental Figure 4. The role of  $\beta$ -Catenin in the growth inhibitory effect of CYD-6-17 on RCC cells.** **A.** Real time-PCR detecting the expression of  $\beta$ -Catenin mRNA in cells treated with CYD-6-17 for 48 hr. **B.** HK-2 KD cells were transiently co-transfected with wild type (WT) or constitutive activated (CA) for  $\beta$ -Catenin 24 hr and then treated with CYD-6-17 (0.5  $\mu$ M) for 48 hr. Western blot analysis was performed to determine the expression of  $\beta$ -Catenin levels, and MTT assays were performed to determine cell viability. \*  $p < 0.05$ .

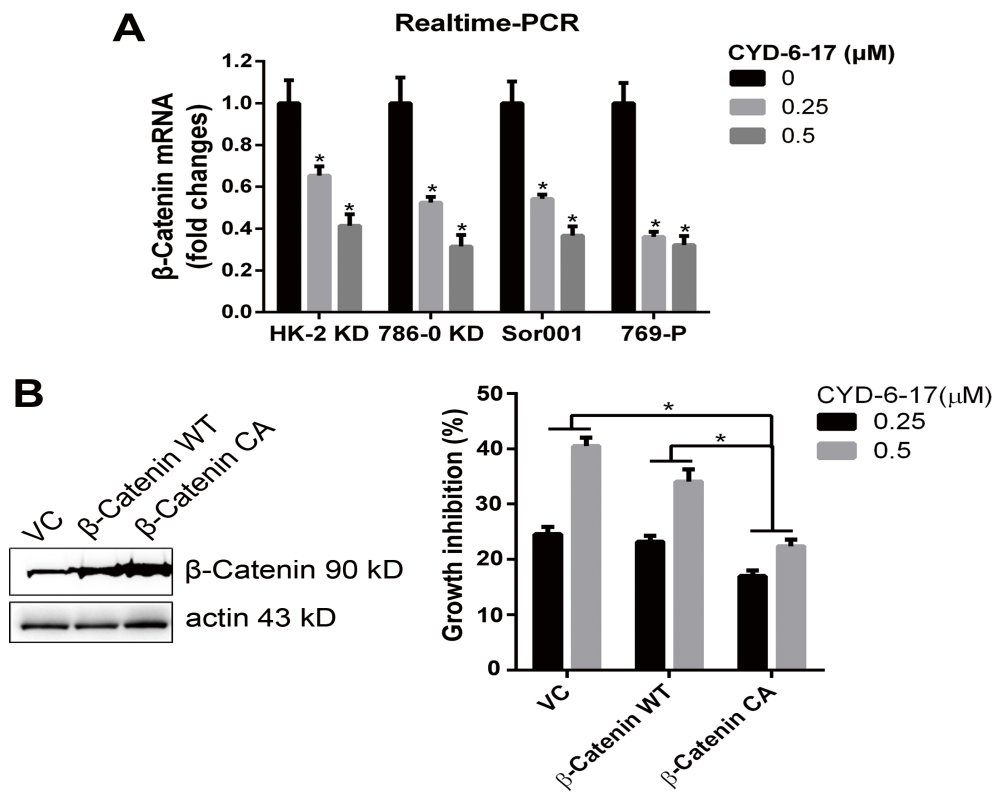

**Supplemental Figure 5. The relationship between GSK3 $\beta$  and PDPK1 in modulating  $\beta$ -Catenin protein levels.** A. Sor001 cells were transiently co-transfected with different dose of PDPK1 cDNA for 48 hr, western blot analyses were performed to determine the expression of PDPK1,  $\beta$ -Catenin and cell-cycle related markers. B.HK-2 KD cells were transiently co-transfected with constitutive activated (CA) GSK3 $\beta$  and wild type (WT) PDPK1 for 48 hr. Western blot analyses were performed to determine the expression of PDPK1, GSK3 $\beta$ , and  $\beta$ -Catenin levels.

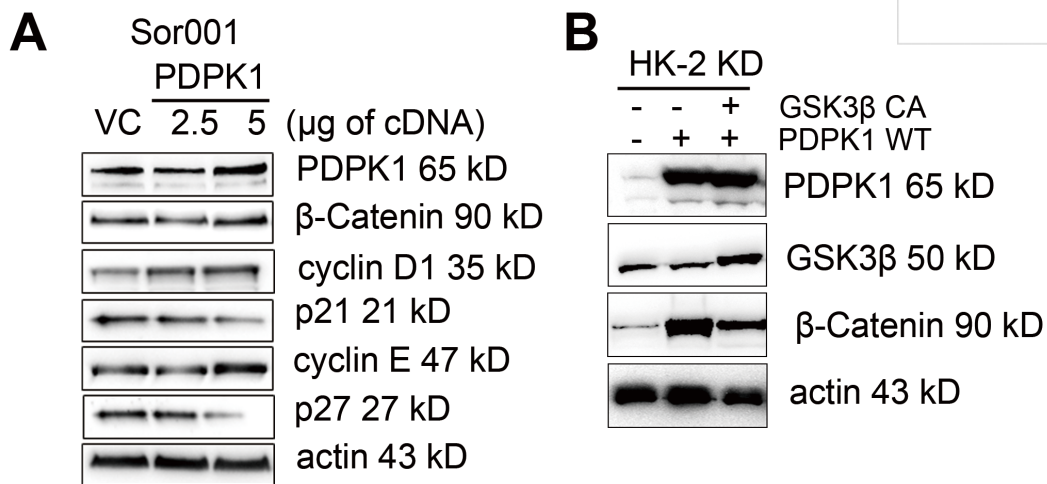

**Supplemental Figure 6. The role of AKT in the growth inhibitory effect of CYD-6-17 on RCC cells.** **A.** Western blot analyses of the expression of total AKT, activated AKT (p-AKT), total P70S6K1 and phosphorylated P70S6K1 in HK-2 KD cells treated with CYD-6-17. **B.** HK-2 KD cells were transfected with VC or CA AKT for 24 hr. Western blot analyses of the expression of AKT protein (Left panel) and MTT assay of determining cell viabilities treated with control or CYD-6-17 (Right panel). \*  $p < 0.05$ .

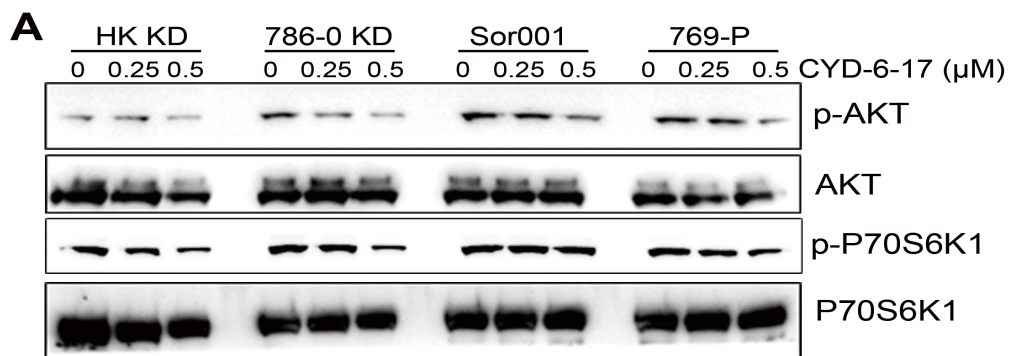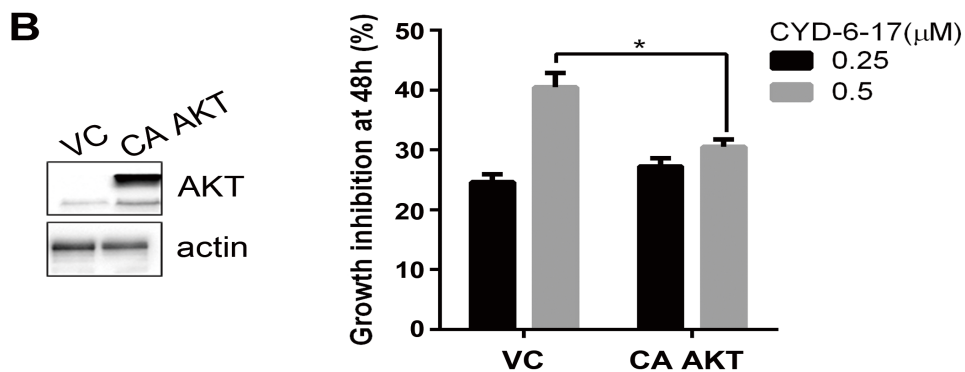

**Supplemental Table 1. RCC patients received targeted therapies in TCGA dataset.**

| bcr_patient_barcode | drug_name                                 | vital_status 1-<br>dead; 0-alive | followup time after<br>treatments (days) | relative PDPK1 mRNA level<br>(RNA-Seq) |
|---------------------|-------------------------------------------|----------------------------------|------------------------------------------|----------------------------------------|
| TCGA-CZ-5469        | Sunitinib                                 | 1                                | 723                                      | 767.6119                               |
| TCGA-BP-4165        | Sunitinib                                 | 0                                | 450                                      | 776.6397                               |
| TCGA-CJ-6033        | Avastin Gemcitabine INF                   | 1                                | 192                                      | 805.9682                               |
| TCGA-B0-5107        | Sunitinib                                 | 1                                | 916                                      | 809.3443                               |
| TCGA-B8-4153        | Pazopanib                                 | 0                                | 167                                      | 843.4227                               |
| TCGA-CJ-5676        | Pazopanib                                 | 0                                | 2507                                     | 965.7773                               |
| TCGA-CJ-4881        | Temsirolimus                              | 0                                | 83                                       | 978.5176                               |
| TCGA-CJ-4890        | Sorafenib Sunitinib Tipifarnib Interferon | 0                                | 2016                                     | 987.3751                               |
| TCGA-CJ-4900        | Tarceva Avastin                           | 1                                | 1366                                     | 987.3751                               |
| TCGA-BP-4354        | Sunitinib Sorafenib Temsirolimus Gefitini | 1                                | 1024                                     | 994.4899                               |
| TCGA-CJ-4869        | Nexavaar Sunitinib                        | 0                                | 1787                                     | 996.4974                               |
| TCGA-CJ-4875        | Nexavaar                                  | 0                                | 1270                                     | 1038.5024                              |
| TCGA-CJ-4638        | Gemcitabine 5-Flu IL-2 Avastin            | 1                                | 361                                      | 1039.7213                              |
| TCGA-CJ-4895        | Tarceva Avastin Avastin                   | 1                                | 1155                                     | 1054.1001                              |
| TCGA-CJ-4888        | Sunitinib                                 | 1                                | 991                                      | 1060.566                               |
| TCGA-CJ-4868        | Avastin Proleukin Gemcitabine             | 1                                | 589                                      | 1063.8491                              |
| TCGA-B0-5694        | Pazopanib                                 | 1                                | 52                                       | 1077.2664                              |
| TCGA-B0-4837        | Tyrosine kinase inhibitor                 | 1                                | 159                                      | 1109.796                               |
| TCGA-CZ-4860        | Sorafenib                                 | 1                                | 152                                      | 1165.3465                              |
| TCGA-CJ-4644        | Intron A Capecitabine Avastin Tarceva     | 1                                | 174                                      | 1169.9194                              |
| TCGA-BP-4985        | Sunitinib                                 | 1                                | 645                                      | 1174.2641                              |
| TCGA-B8-5162        | Sunitinib                                 | 0                                | 79                                       | 1186.3214                              |
| TCGA-BP-5178        | Sorafenib                                 | 1                                | 1516                                     | 1188.4795                              |
| TCGA-CJ-4637        | Temsirolimus Roferon-A Intron A Sunitini  | 1                                | 2180                                     | 1198.7575                              |
| TCGA-CJ-4904        | Nexavaar                                  | 0                                | 1497                                     | 1205.0755                              |
| TCGA-BP-5009        | Sunitinib Everolimus Bevacizumb Pazopa    | 1                                | 754                                      | 1218.1231                              |
| TCGA-BP-4787        | Sunitinib Sorafenib Temsirolimus          | 1                                | 427                                      | 1230.6798                              |
| TCGA-CZ-4861        | Sorafenib - Nexavar                       | 1                                | 488                                      | 1252.2936                              |
| TCGA-B0-5115        | Afinitor (Everolimus)                     | 0                                | 586                                      | 1256.3873                              |

|              |                                 |   |      |           |
|--------------|---------------------------------|---|------|-----------|
| TCGA-BP-4804 | Sunitinib                       | 0 | 171  | 1274.4479 |
| TCGA-BP-4169 | Interferon Axitinib             | 1 | 665  | 1275.8655 |
| TCGA-BP-4329 | Interferon Temsirolimus         | 1 | 655  | 1293.7959 |
| TCGA-CZ-5464 | Pazopanib Sunitinib             | 0 | 85   | 1384.131  |
| TCGA-CJ-4871 | Alpha Interferon                | 0 | 2325 | 1393.9394 |
| TCGA-CW-5590 | Sunitinib                       | 1 | 847  | 1453.2259 |
| TCGA-CZ-5461 | Sunitinib                       | 1 | 285  | 1497.6097 |
| TCGA-BP-4974 | Sunitinib Sorafenib Gefitinib   | 1 | 164  | 1507.8756 |
| TCGA-CZ-5454 | Sunitinib                       | 1 | 685  | 1530.7013 |
| TCGA-BP-4161 | Sunitinib                       | 0 | 6    | 1540.4033 |
| TCGA-B0-5094 | Torisel                         | 1 | 209  | 1590.1798 |
| TCGA-AK-3436 | Sunitinib                       | 0 | 1968 | 1601.1777 |
| TCGA-BP-4338 | Sunitinib Sorafernib Everolimus | 0 | 1094 | 1665.9879 |
| TCGA-BP-5189 | Temsirolimus Bevacizumb         | 1 | 162  | 1686.364  |
| TCGA-BP-4342 | Sorafenib                       | 1 | 503  | 1741.1414 |
| TCGA-CZ-5462 | Sunitinib                       | 1 | 296  | 1859.826  |
| TCGA-CJ-5680 | Avastin IL-2 Tarceva            | 1 | 715  | 1906.0533 |
| TCGA-CW-5585 | Sunitinib                       | 0 | 46   | 1917.2368 |
| TCGA-CJ-6028 | Interferon Sunitinib Sorafenib  | 1 | 1584 | 1982.8386 |
| TCGA-CJ-5681 | IL-2 Gemcitabine Avastin        | 1 | 446  | 1983.0564 |
| TCGA-CZ-5456 | Pazopanib                       | 0 | 434  | 2055.6603 |
| TCGA-B2-5639 | Torisel                         | 0 | 343  | 2124.3705 |
| TCGA-A3-3317 | Sorafenib                       | 0 | 886  | 2600.483  |
